# Supplementary material for: Phase-Separated Structure of NBR/PVC Blends with Different Acrylonitrile Contents Investigated Using STEM–EDS Mapping Analysis
Source: MDPI journal article supplement (doi:10.3390/polym15163343), 2023-08-09
Supplement: s1 [file s1]

**Supplementary materials for**  
**Phase-separated structure of NBR/PVC blends with**  
**different acrylonitrile contents investigated using**  
**STEM-EDS mapping analysis**

Yuka Komori\*<sup>1, 2</sup> • Aoi Taniguchi<sup>2</sup> • Haruhisa Shibata<sup>1</sup> •  
Shinya Goto<sup>1</sup> • Hiromu Saito<sup>2</sup>

<sup>1</sup>Materials Engineering R&D Division, DENSO  
CORPORATION, Kariya-shi 448-8661, Aichi, Japan

<sup>2</sup>Department of Organic and Polymer Materials  
Chemistry, Tokyo University of Agriculture and  
Technology, Koganei-shi 184-8588, Tokyo, Japan

# *Ec* and *V* of the constituents of NBR and PVC

| group           | cohesive energy<br>$E_C$ (J/mol) | molar volume<br>$V$ (cm <sup>3</sup> /mol) |
|-----------------|----------------------------------|--------------------------------------------|
| CH <sub>2</sub> | 4940                             | 16.1                                       |
| CH              | 3430                             | −1.0                                       |
| − CH =          | 4310                             | 13.5                                       |
| CN              | 25530                            | 24.0                                       |
| Cl              | 11550                            | 24.0                                       |

## Acrylonitrile part of NBR

$$E_C = 4940 + 3430 + 25530 = 33900$$

$$V = 16.1 + (-1.0) + 24.0 = 39.1$$

## Butadiene part of NBR

$$E_C = 4940 + 4940 + 4310 + 4310 = 18500$$

$$V = 16.1 + 16.1 + 13.5 + 13.5 = 59.2$$

## NBR-L (AN content: 18.0 wt%)

$$E_C = 33900 \times 0.18 + 18500 \times 0.82 = 21272$$

$$V = 39.1 \times 0.18 + 59.2 \times 0.82 = 55.582$$

$$\delta_{\text{NBR-L}} = (E_C/V)^{0.5} = 19.6$$

## NBR-M (AN content: 29.0 wt%)

$$E_C = 33900 \times 0.29 + 18500 \times 0.71 = 22966$$

$$V = 39.1 \times 0.29 + 59.2 \times 0.71 = 53.371$$

$$\delta_{\text{NBR-M}} = (E_C/V)^{0.5} = 20.7$$

## NBR-H (AN content: 33.5 wt%)

$$E_C = 33900 \times 0.335 + 18500 \times 0.665 = 23659$$

$$V = 39.1 \times 0.335 + 59.2 \times 0.665 = 52.4665$$

$$\delta_{\text{NBR-H}} = (E_C/V)^{0.5} = 21.2$$

## PVC

$$E_C = 4940 + 3430 + 11550 = 19920$$

$$V = 16.1 + (-1.0) + 24.0 = 39.1$$

$$\delta_{\text{PVC}} = (E_C/V)^{0.5} = 22.6$$

Figure S1. *Ec* and *V* of the constituents of NBR and PVC, and the calculated procedure of the solubility parameter.

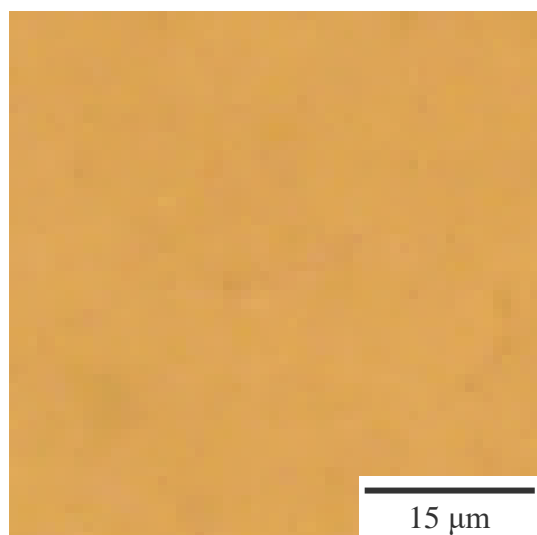

Figure S2. Optical micrograph of the 60/40 NBR-L/PVC, in which PVC domains with a diameter about 1  $\mu\text{m}$  dispersed in the NBR matrix were observed via the STEM images shown in Figure 3a.

(a)

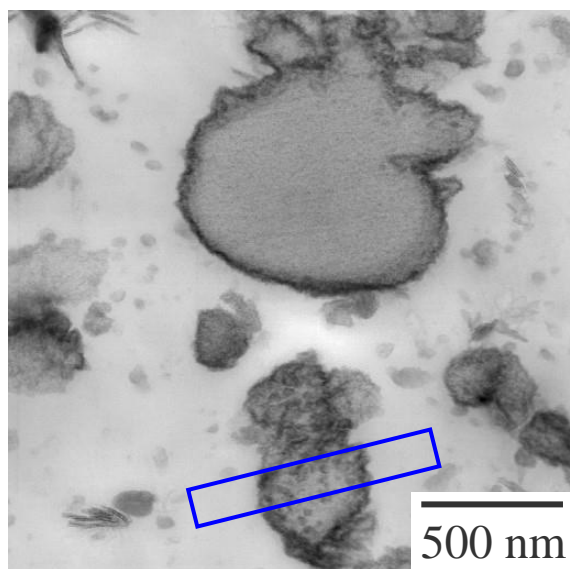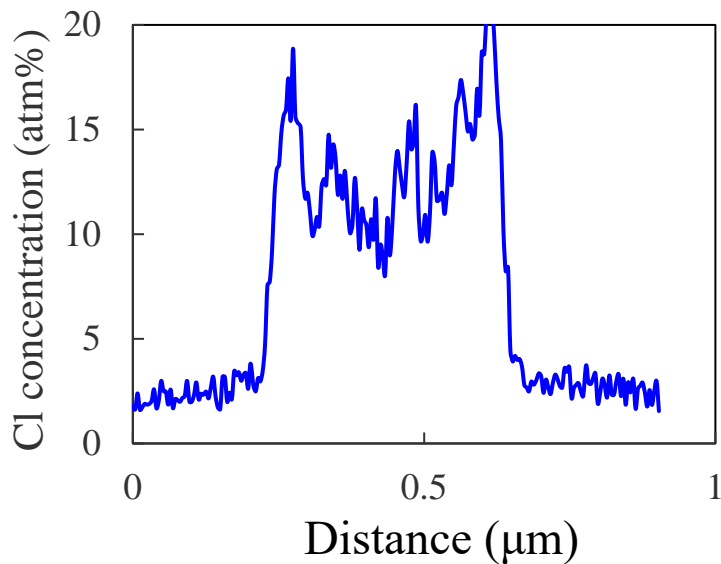

(b)

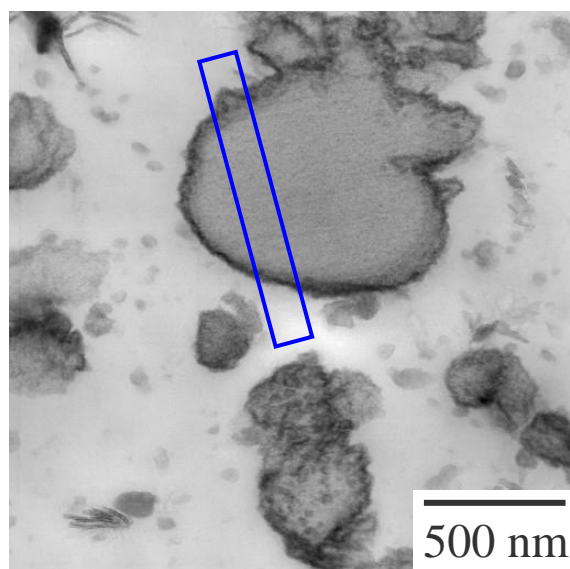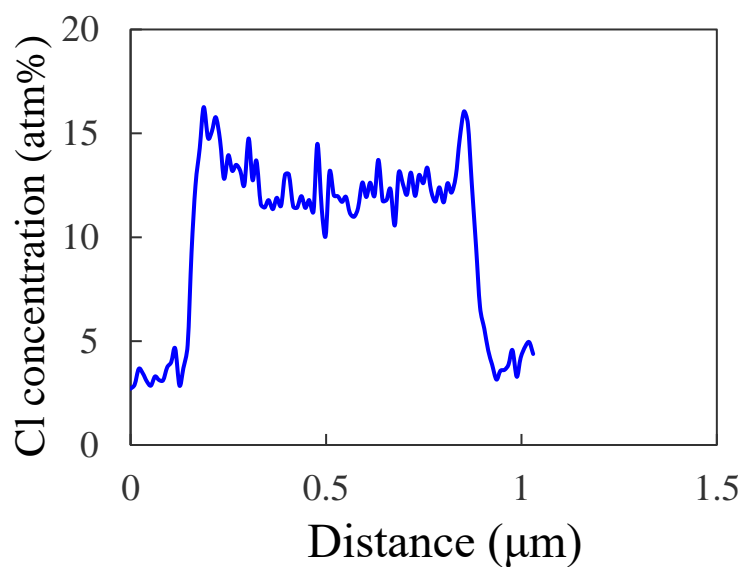

(c)

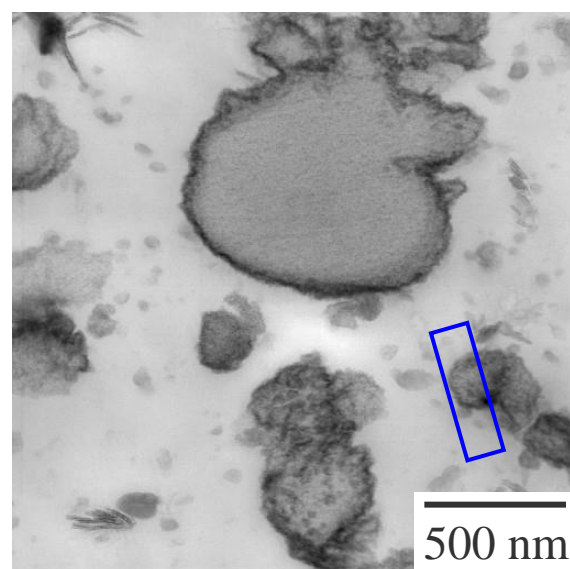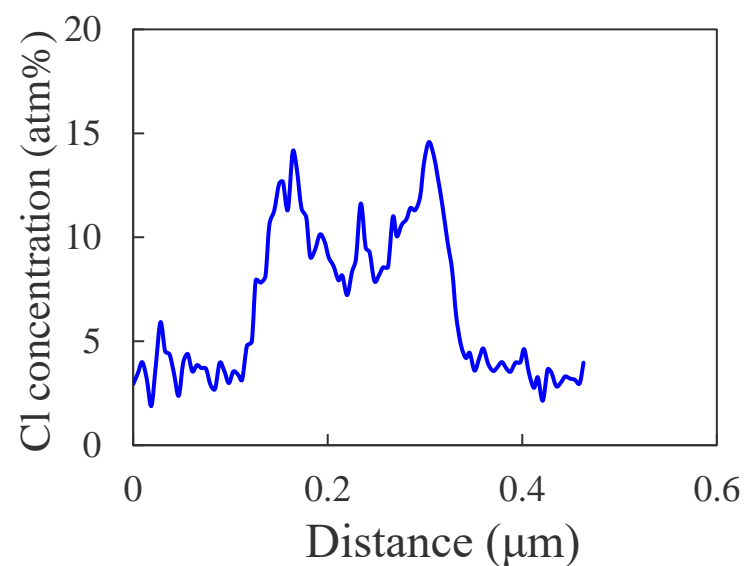

Figure S3. Concentration distribution of chlorine for the 60/40 NBR-L/PVC at different areas.

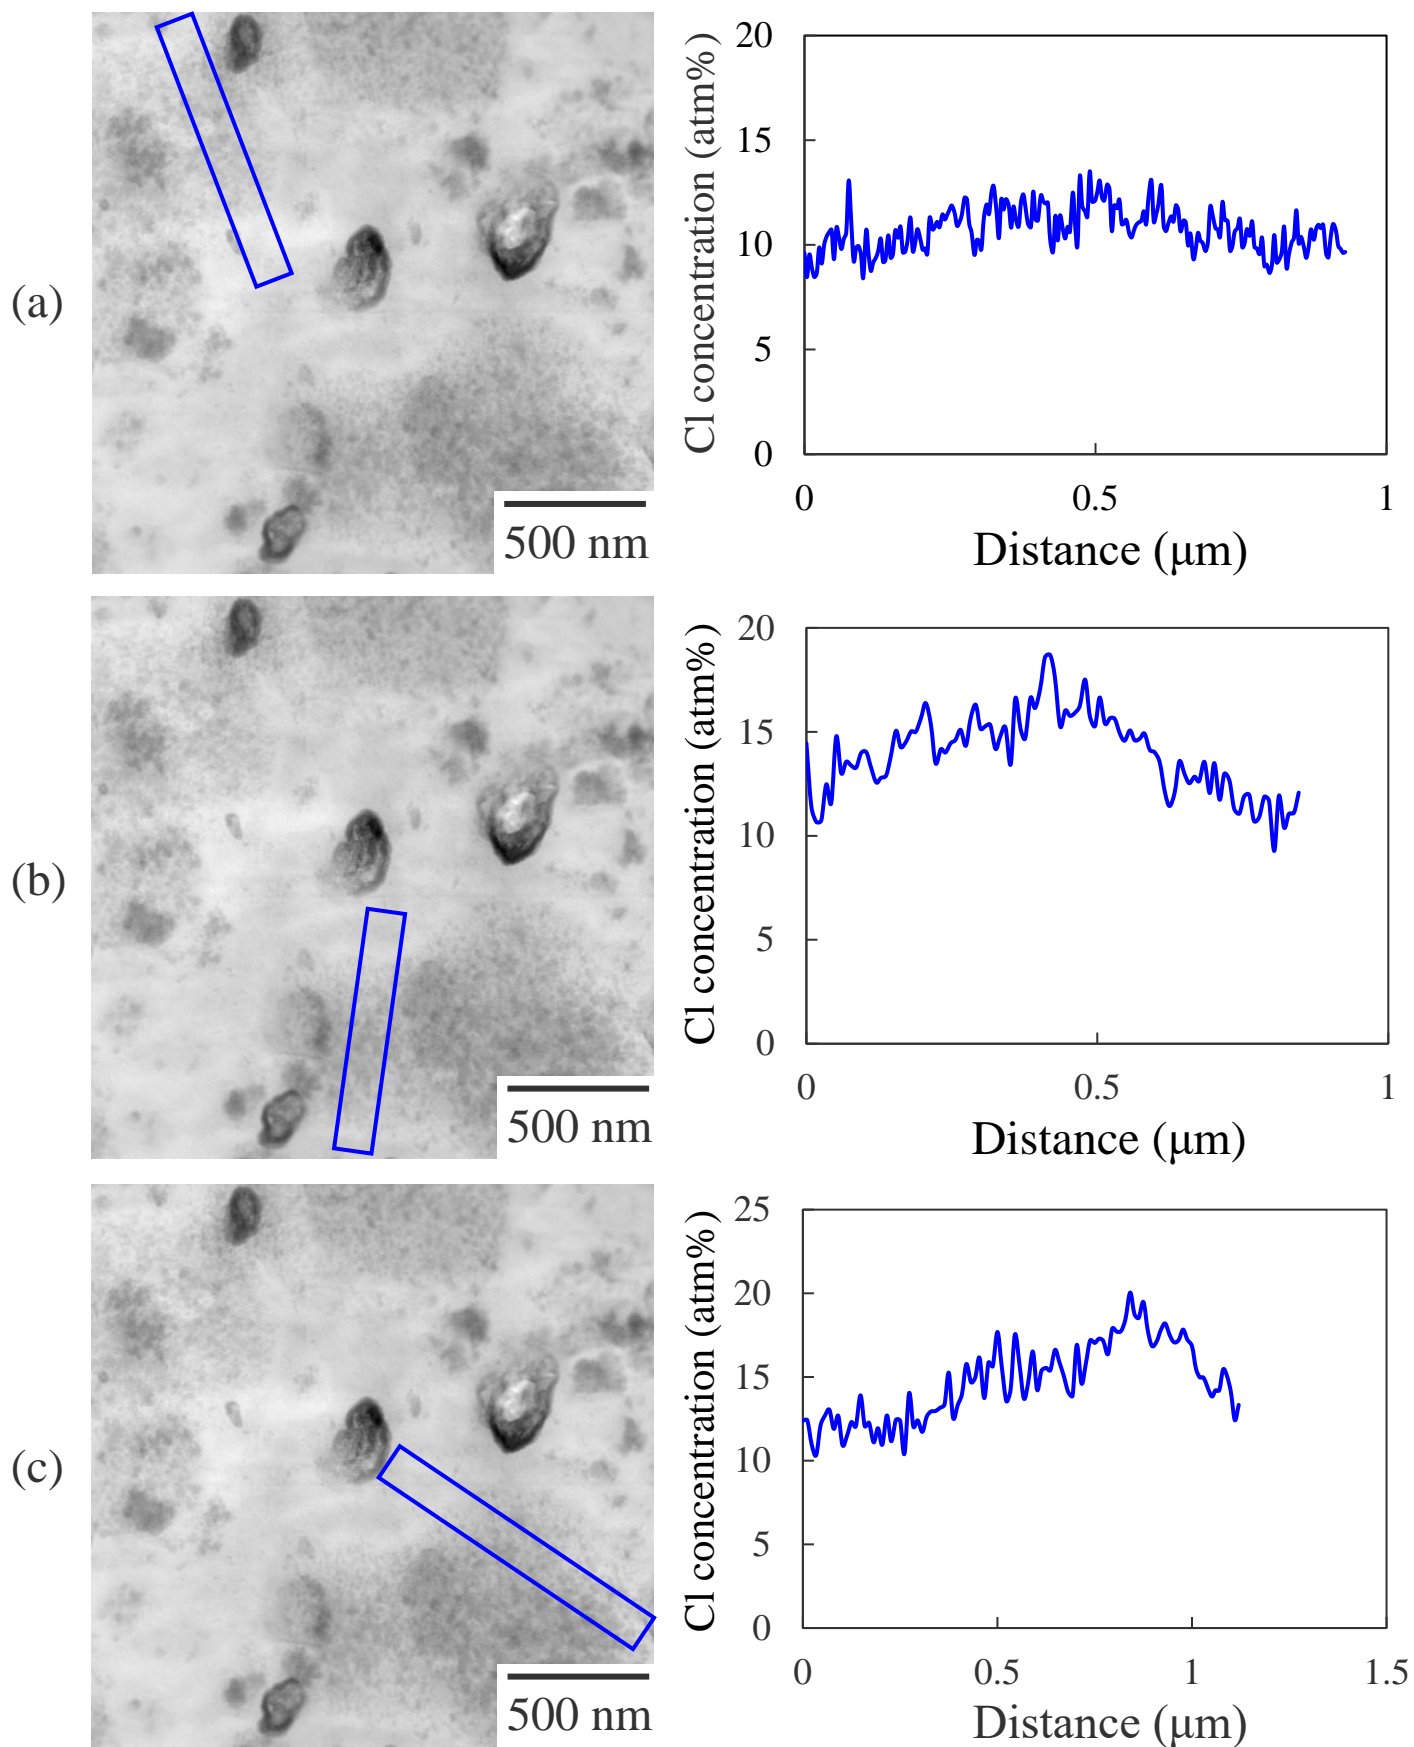

Figure S4. Concentration distribution of chlorine for the 60/40 NBR-M/PVC at different areas.

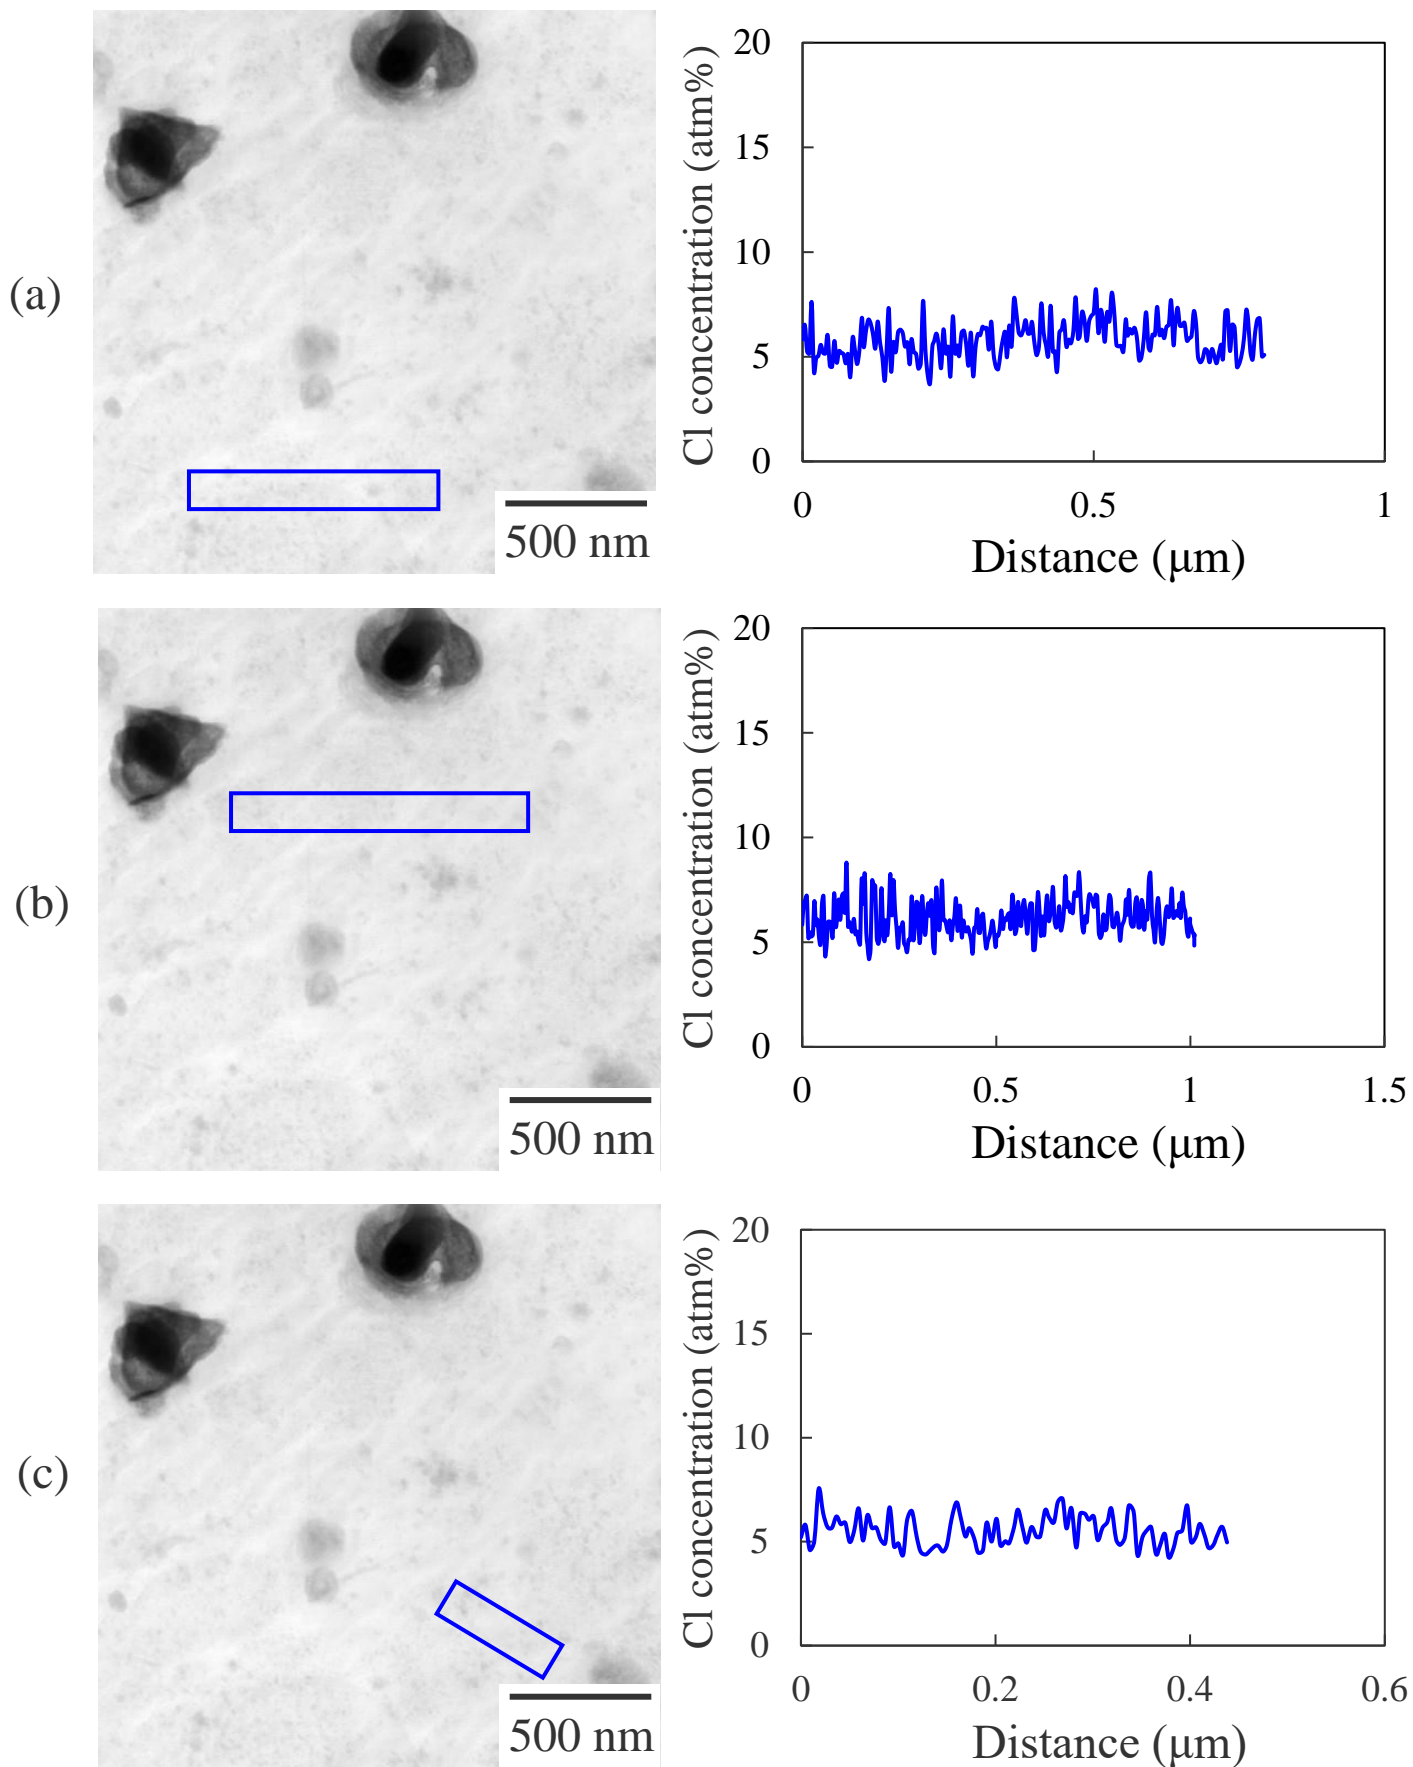

Figure S5. Concentration distribution of chlorine for the 60/40 NBR-H/PVC at different areas.
